# Supplementary material for: Spatial Variation in Soil Fungal Communities across Paddy Fields in Subtropical China
Source: PubMed Central journal article supplement (PMC6946795; doi:10.1128/msystems.00704-19), 2020-01-07

### Sorensen's index

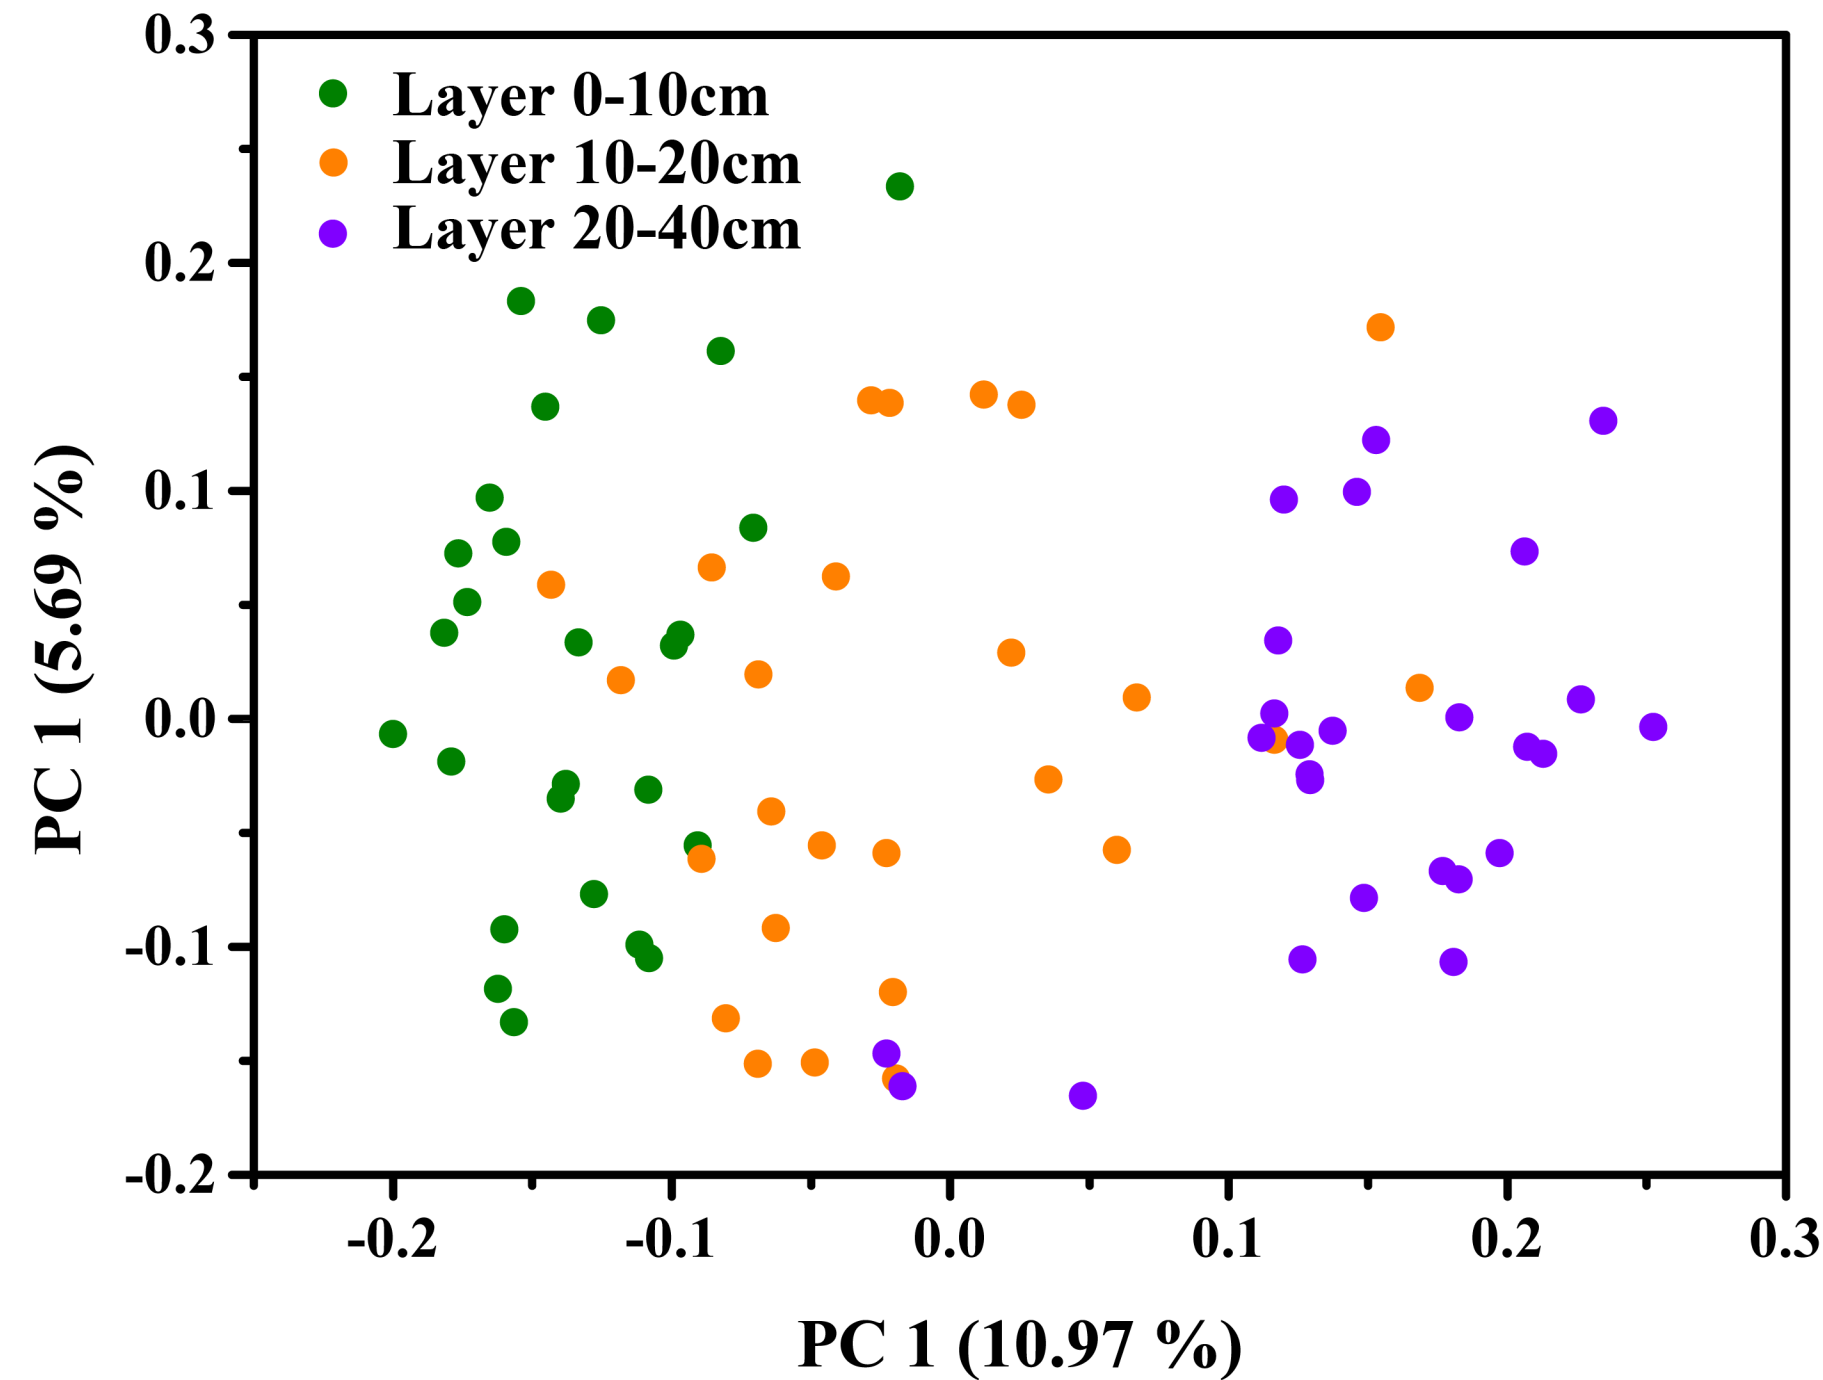

### Bray-Curtis dissimilarity

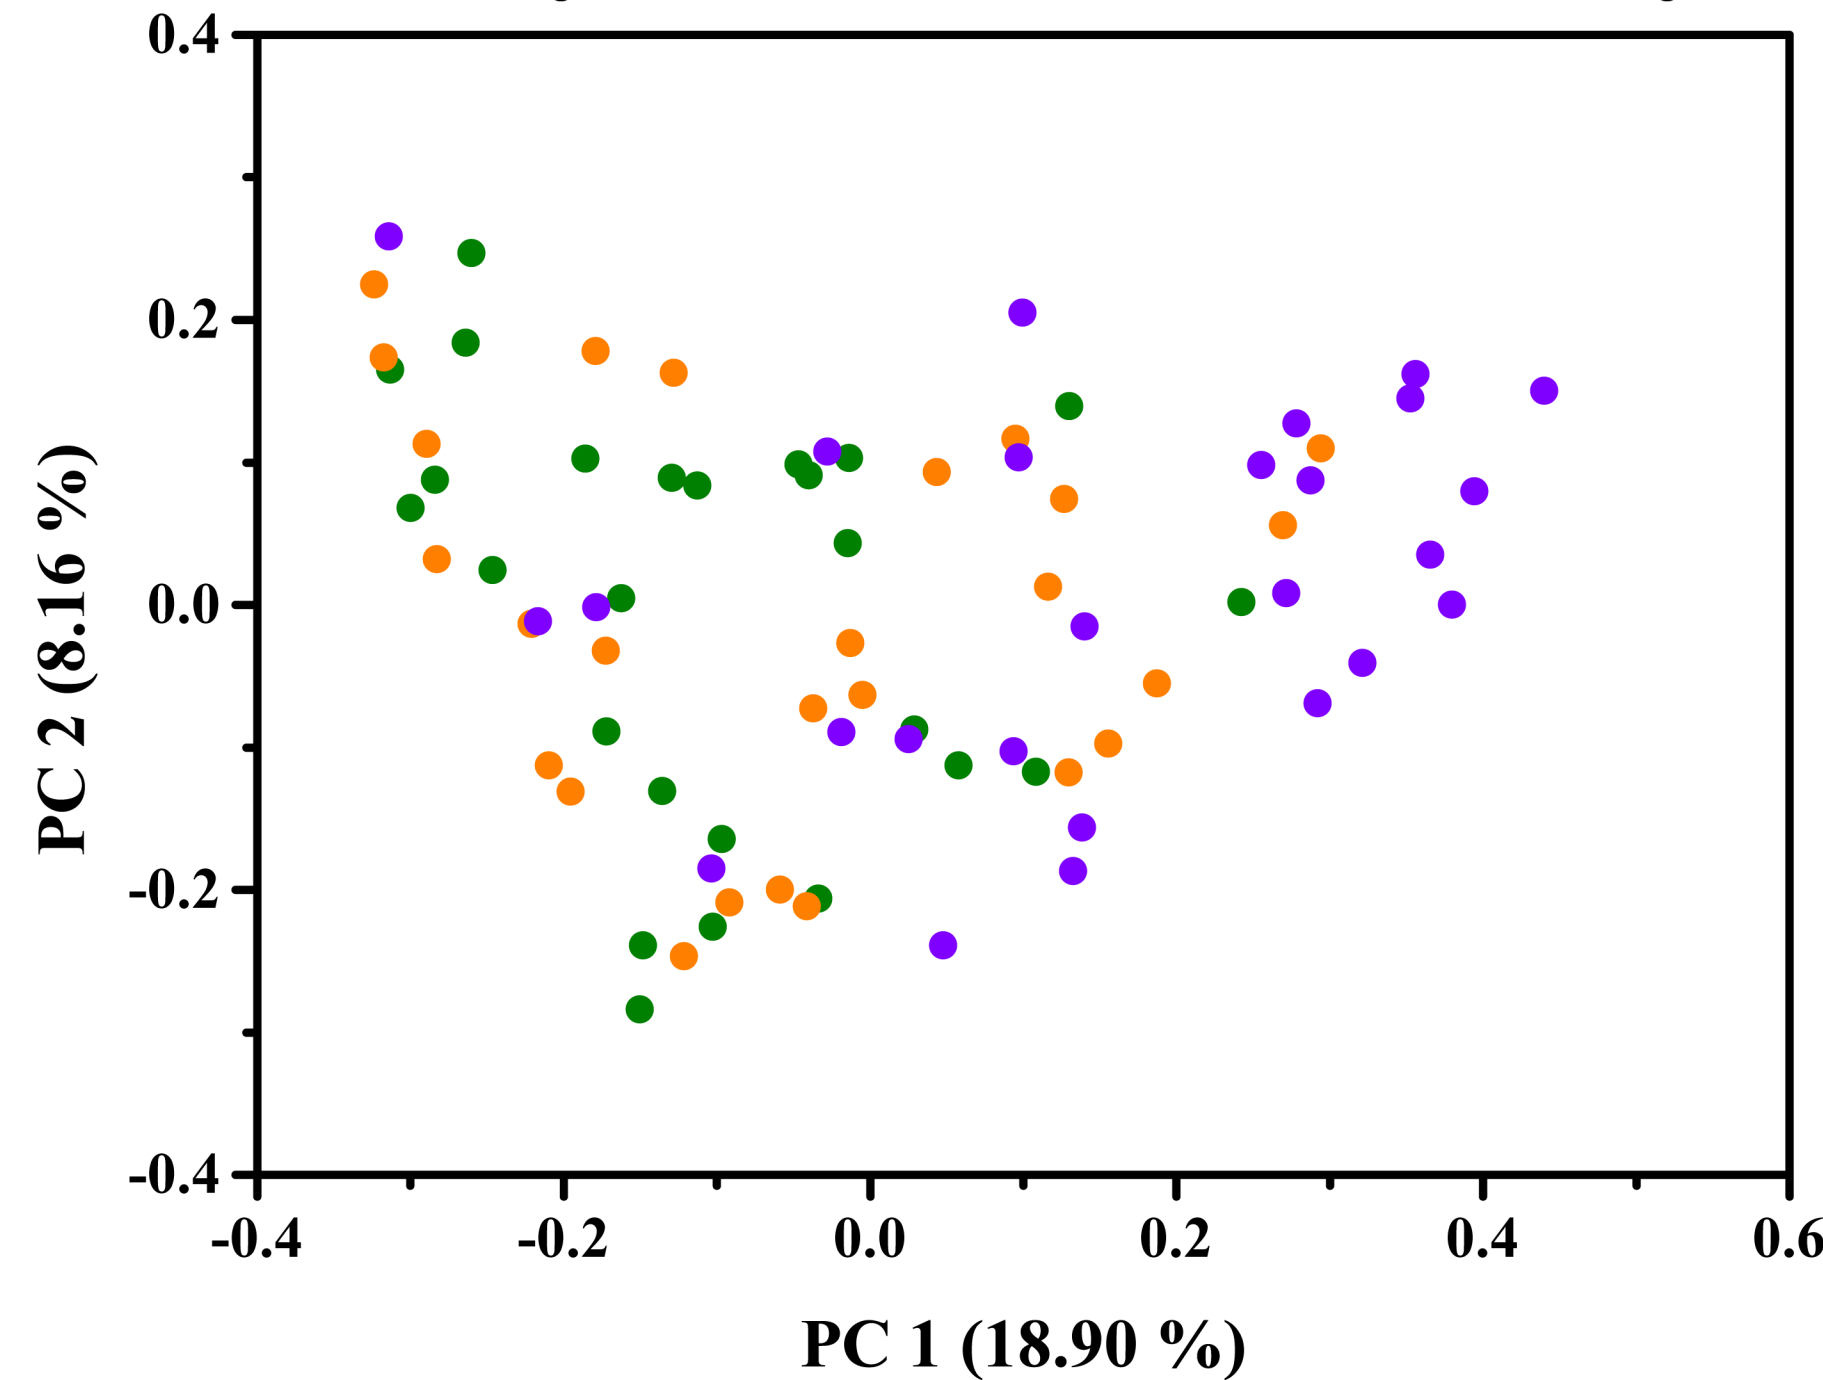

### Jaccard distance

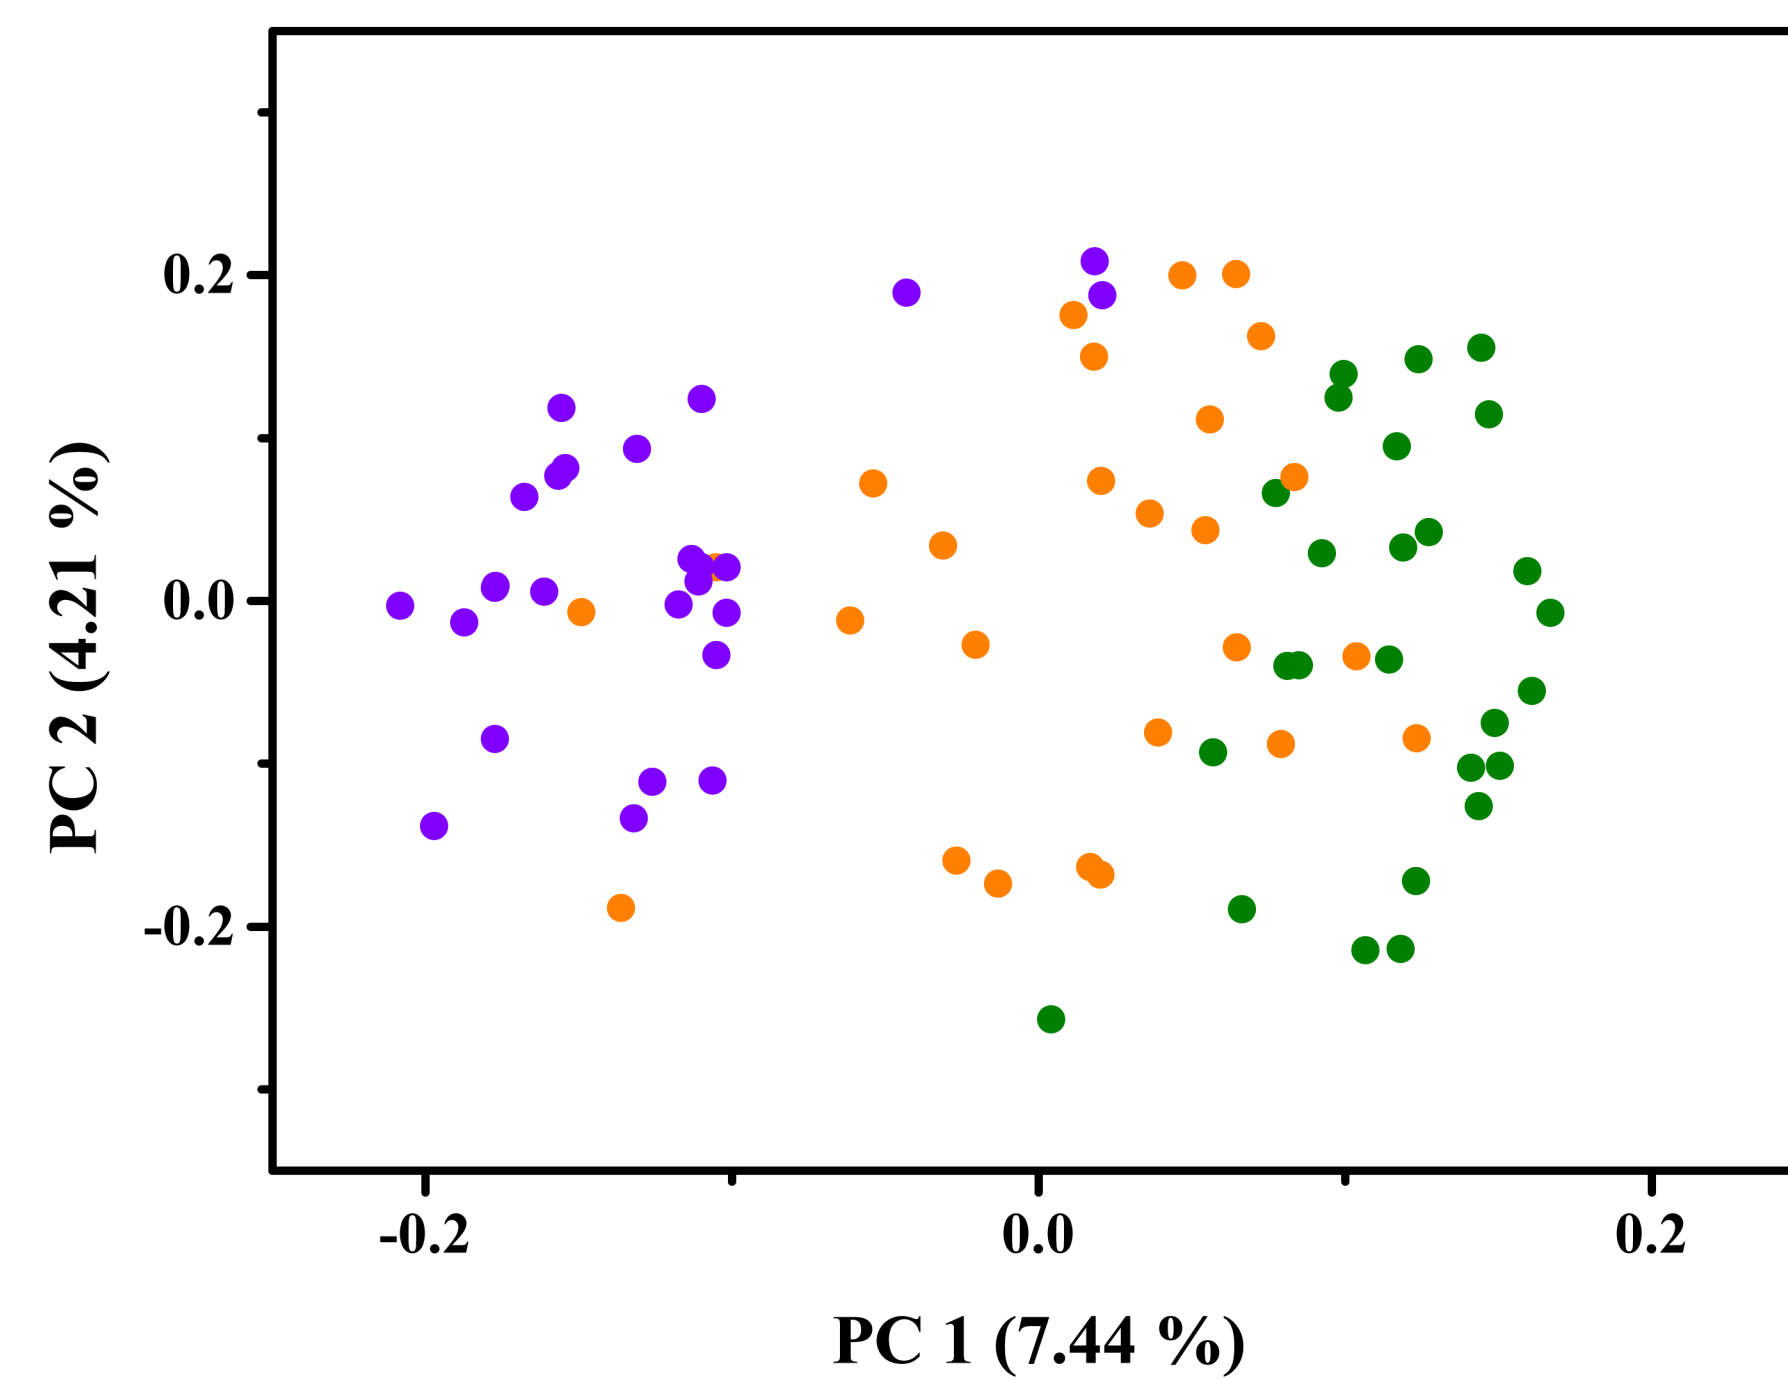

Supplement: mSystems.00704-19-sf004.pdf [file mSystems.00704-19-sf004.pdf]
