# Supplementary material for: Spatial Variation in Soil Fungal Communities across Paddy Fields in Subtropical China
Source: PubMed Central journal article supplement (PMC6946795; doi:10.1128/msystems.00704-19), 2020-01-07
Supplement: mSystems.00704-19-st001.pdf [file mSystems.00704-19-st001.pdf]

**Table S1A.** The top panel shows average coefficient of variation (CV) of soil properties in different soil layers, and the bottom panel shows correlations between soil properties and geographical distance in each soil layer. Values of CV are mean  $\pm$  standardized error. Different letters indicate significant differences at  $P < 0.05$ . \*, \*\*, and \*\*\* indicate significant effects at  $P < 0.05$ , 0.01, and 0.001, respectively.

|                                                                | Layer 0-10cm        | Layer 10-20cm       | Layer 20-40cm       |
|----------------------------------------------------------------|---------------------|---------------------|---------------------|
| Average coefficient of variation                               |                     |                     |                     |
| Average                                                        | 27.05 $\pm$ 15.64 a | 29.84 $\pm$ 16.05 a | 38.80 $\pm$ 22.72 a |
| CV (%)                                                         |                     |                     |                     |
| Correlations between soil properties and geographical distance |                     |                     |                     |
| SOC                                                            | -0.049              | 0.084               | 0.190**             |
| TN                                                             | -0.001              | 0.084               | 0.299***            |
| TP                                                             | -0.077              | 0.001               | 0.041               |
| C:N                                                            | 0.104               | 0.131*              | 0.216***            |
| TK                                                             | -0.006              | -0.022              | 0.026               |
| AN                                                             | -0.091              | 0.075               | 0.186**             |
| AP                                                             | -0.116*             | -0.089              | 0.032               |
| Fe                                                             | 0.127*              | 0.231***            | 0.238***            |
| pH                                                             | 0.036               | 0.075               | 0.143*              |
| CEC                                                            | -0.003              | 0.044               | 0.029               |

**Table S1B.** One-way permANOVA showing the difference of soil properties between soil parent materials.

| Variable              | <i>F</i> | <i>P</i> |
|-----------------------|----------|----------|
| Soil parent materials | 0.733    | 0.488    |
