# Supplementary material for: Spatial Variation in Soil Fungal Communities across Paddy Fields in Subtropical China
Source: PubMed Central journal article supplement (PMC6946795; doi:10.1128/msystems.00704-19), 2020-01-07
Supplement: mSystems.00704-19-st002.pdf [file mSystems.00704-19-st002.pdf]

**Table S2.** Correlations between relative abundance of fungal phyla and soil properties. Coefficients were determined by Pearson test. \*, \*\*, and \*\*\* indicate significant correlations at  $P < 0.05$ ,  $0.01$ , and  $0.001$ , respectively.

|           | Ascomycota | Zygomycota | Basidiomycota | Chytridiomycota | Glomeromycota | Neocallimastigomycota |
|-----------|------------|------------|---------------|-----------------|---------------|-----------------------|
| SOC       | 0.393 ***  | -0.459 *** | 0.096         | 0.604 ***       | 0.123         | 0.167                 |
| TN        | 0.366 ***  | -0.427 *** | 0.084         | 0.560 ***       | 0.144         | 0.147                 |
| TP        | 0.099      | -0.168     | 0.154         | 0.229 *         | -0.020        | 0.081                 |
| C:N ratio | 0.283 *    | -0.300 **  | 0.086         | 0.270 *         | -0.070        | 0.138                 |
| TK        | -0.149     | 0.128      | 0.001         | -0.097          | 0.098         | -0.186                |
| AN        | 0.376 ***  | -0.452 *** | 0.143         | 0.540 ***       | 0.123         | 0.135                 |
| AP        | 0.186      | -0.336 **  | 0.387 ***     | 0.316 **        | -0.068        | 0.190                 |
| Fe        | -0.426 *** | 0.551 ***  | -0.415 ***    | -0.377 ***      | 0.111         | -0.072                |
| pH        | -0.162     | 0.245 *    | -0.109        | -0.400 ***      | -0.173        | -0.222                |
| CEC       | 0.156      | -0.118     | -0.179        | 0.285 *         | 0.130         | 0.083                 |
