# Supplementary material for: Spatial Variation in Soil Fungal Communities across Paddy Fields in Subtropical China
Source: PubMed Central journal article supplement (PMC6946795; doi:10.1128/msystems.00704-19), 2020-01-07
Supplement: mSystems.00704-19-st003.pdf [file mSystems.00704-19-st003.pdf]

**Table S3A.** One-way permANOVA showing the difference of fungal communities between soil layers.

|                                | Sørensen's index |          | Bray-Curtis dissimilarity |          | Jaccard  |          |
|--------------------------------|------------------|----------|---------------------------|----------|----------|----------|
|                                | <i>F</i>         | <i>P</i> | <i>F</i>                  | <i>P</i> | <i>F</i> | <i>P</i> |
| Layer 0-10cm vs Layer 10-20cm  | 2.971            | < 0.001  | 2.20                      | 0.004    | 2.233    | < 0.001  |
| Layer 0-10cm vs Layer 20-40cm  | 7.502            | < 0.001  | 6.285                     | < 0.001  | 4.984    | < 0.001  |
| Layer 10-20cm vs Layer 20-40cm | 3.527            | < 0.001  | 4.321                     | < 0.001  | 2.576    | < 0.001  |

**Table S3B.** One-way permANOVA showing the effects of soil parent material on fungal community composition.

| Variable              | Sørensen's index |          | Bray-Curtis dissimilarity |          | Jaccard  |          |
|-----------------------|------------------|----------|---------------------------|----------|----------|----------|
|                       | <i>F</i>         | <i>P</i> | <i>F</i>                  | <i>P</i> | <i>F</i> | <i>P</i> |
| Soil parent materials | 2.239            | < 0.001  | 2.516                     | < 0.001  | 1.846    | < 0.001  |
