# Supplementary material for: Spatial Variation in Soil Fungal Communities across Paddy Fields in Subtropical China
Source: PubMed Central journal article supplement (PMC6946795; doi:10.1128/msystems.00704-19), 2020-01-07
Supplement: mSystems.00704-19-st004.pdf [file mSystems.00704-19-st004.pdf]

**Table S4.** Partial Mantel tests showing the correlations between soil properties and beta-diversity indexes of fungal communities. Sørensen: Sørensen's index; Bray-Curtis: Bray-Curtis dissimilarity; Jaccard: Jaccard distance. \*, \*\*, and \*\*\* indicate significant effects at  $P < 0.05$ , 0.01, and 0.001, respectively.

|     | Layer 0-10cm    |                 |                 | Layer 10-20cm   |                |                 | Layer 20-40cm  |                |                 |
|-----|-----------------|-----------------|-----------------|-----------------|----------------|-----------------|----------------|----------------|-----------------|
|     | Sørensen        | Bray-Curtis     | Jaccard         | Sørensen        | Bray-Curtis    | Jaccard         | Sørensen       | Bray-Curtis    | Jaccard         |
| SOC | <b>0.129*</b>   | 0.032           | <b>0.128*</b>   | <b>0.136*</b>   | 0.066          | <b>0.193***</b> | 0.036          | 0.108          | 0.105           |
| TN  | <b>0.171**</b>  | 0.011           | <b>0.172**</b>  | <b>0.21***</b>  | <b>0.115*</b>  | <b>0.211***</b> | 0.035          | 0.085          | <b>0.128*</b>   |
| TP  | <b>0.191**</b>  | <b>0.151**</b>  | <b>0.189***</b> | 0.077           | <b>0.110*</b>  | <b>0.119*</b>   | <b>0.147**</b> | 0.008          | <b>0.211***</b> |
| CN  | 0.029           | 0.026           | 0.03            | 0.076           | <b>0.122*</b>  | <b>0.221***</b> | 0.007          | 0.045          | 0.043           |
| TK  | 0.104           | 0.149           | 0.106           | <b>0.120*</b>   | 0.101          | <b>0.124*</b>   | 0.069          | 0.033          | 0.06            |
| AN  | <b>0.141*</b>   | 0.054           | <b>0.143*</b>   | <b>0.158**</b>  | <b>0.115*</b>  | <b>0.143**</b>  | 0.029          | 0.096          | 0.044           |
| AP  | <b>0.176**</b>  | <b>0.199***</b> | <b>0.179**</b>  | <b>0.220***</b> | <b>0.112*</b>  | <b>0.114*</b>   | <b>0.138*</b>  | 0.045          | <b>0.179**</b>  |
| Fe  | 0.051           | 0.01            | 0.049           | <b>0.115*</b>   | <b>0.127*</b>  | 0.021           | 0.029          | <b>0.160**</b> | 0.051           |
| pH  | <b>0.235***</b> | <b>0.240***</b> | <b>0.231***</b> | <b>0.277***</b> | <b>0.153**</b> | <b>0.166**</b>  | 0.108          | <b>0.111*</b>  | <b>0.170**</b>  |
| CEC | 0.1             | 0.019           | 0.101           | 0.067           | 0.041          | 0.052           | 0.072          | 0.02           | 0.041           |
