# Supplementary material for: Spatial Variation in Soil Fungal Communities across Paddy Fields in Subtropical China
Source: PubMed Central journal article supplement (PMC6946795; doi:10.1128/msystems.00704-19), 2020-01-07
Supplement: mSystems.00704-19-st005.pdf [file mSystems.00704-19-st005.pdf]

**Table S5.** Random forest model showing the potential important factors influencing OTUs that occurred outside or inside predictions by dominance test. The importance of each predictor was determined by assessing the decrease in prediction accuracy (%IncMSE) when the data for the predictor was randomly permuted.  $\sum\%IncMSE$  is the accumulated %IncMSE of each significant predictor.

|                  |                        | Environmental factors         |                | Spatial factors                                                                         |                | R <sup>2</sup> | P    |
|------------------|------------------------|-------------------------------|----------------|-----------------------------------------------------------------------------------------|----------------|----------------|------|
|                  |                        | Variable                      | $\sum\%IncMSE$ | Variable                                                                                | $\sum\%IncMSE$ |                |      |
| layer<br>0-10cm  | Outside<br>predictions | AP, pH, TP, TN                | 39.78          | PCNM16, PCNM24                                                                          | 27.81          | 0.179          | 0.01 |
|                  | Inside<br>predictions  | AP, pH, TP, TK                | 23.39          | PCNM16, PCNM10, PCNM24, PCNM1, PCNM11                                                   | 30.80          | 0.187          | 0.01 |
| layer<br>10-20cm | Outside<br>predictions | pH, AP, AN,<br>TP, TN, TK, Fe | 58.05          | PCNM2, PCNM16, PCNM25, PCNM11, PCNM24,<br>PCNM9, PCNM1, PCNM10, PCNM7, PCNM13,<br>PCNM8 | 83.89          | 0.365          | 0.01 |
|                  | Inside<br>predictions  | TK, AP                        | 8.64           | PCNM2, PCNM16, PCNM5, PCNM20, PCNM18,<br>PCNM25, PCNM14, PCNM23, PCNM24                 | 69.90          | 0.232          | 0.01 |
| layer<br>20-40cm | Outside<br>predictions | pH, CEC, SOC,<br>TN, TK       | 28.96          | PCNM22, PCNM16, PCNM18, PCNM24                                                          | 19.79          | 0.146          | 0.01 |
|                  | Inside<br>predictions  | Fe, SOC, TN,<br>pH, CN, CEC   | 17.66          | PCNM22, PCNM17, PCNM18, PCNM25, PCNM1,<br>PCNM7                                         | 19.87          | 0.125          | 0.01 |
